# Supplementary material for: Towards Routine Implementation of Liquid Biopsies in Cancer Management: It Is Always Too Early, until Suddenly It Is Too Late
Source: MDPI journal article supplement (doi:10.3390/diagnostics11010103), 2021-01-11
Supplement: s1 [file s1]

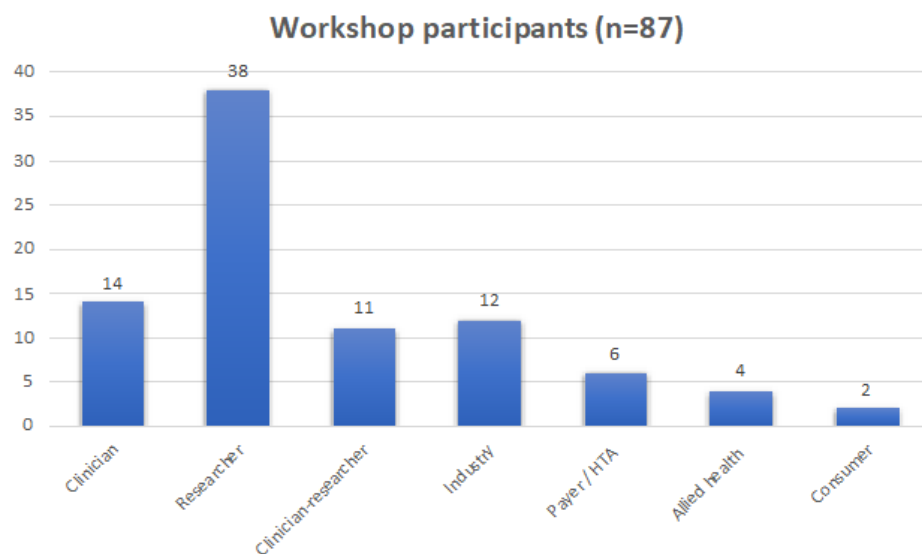

**Figure S1.** Workshop participants consenting to complete the pre-workshop survey.

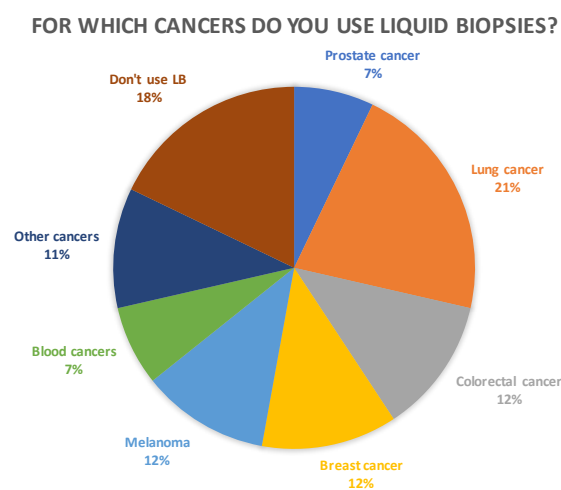

**Figure S2.** Overview of cancers for which liquid biopsies are used by workshop participants.

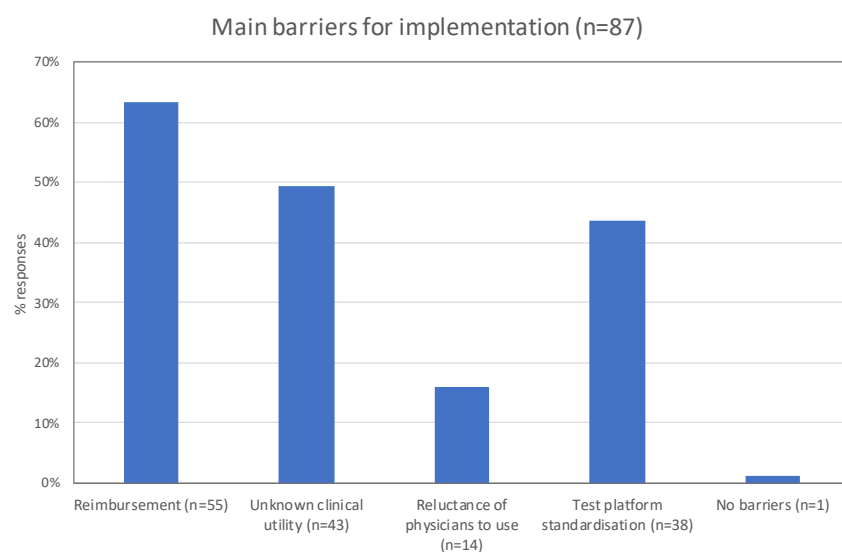

**Figure S3.** What are the main barriers for implementation of liquid biopsies (data from the pre-workshop survey).

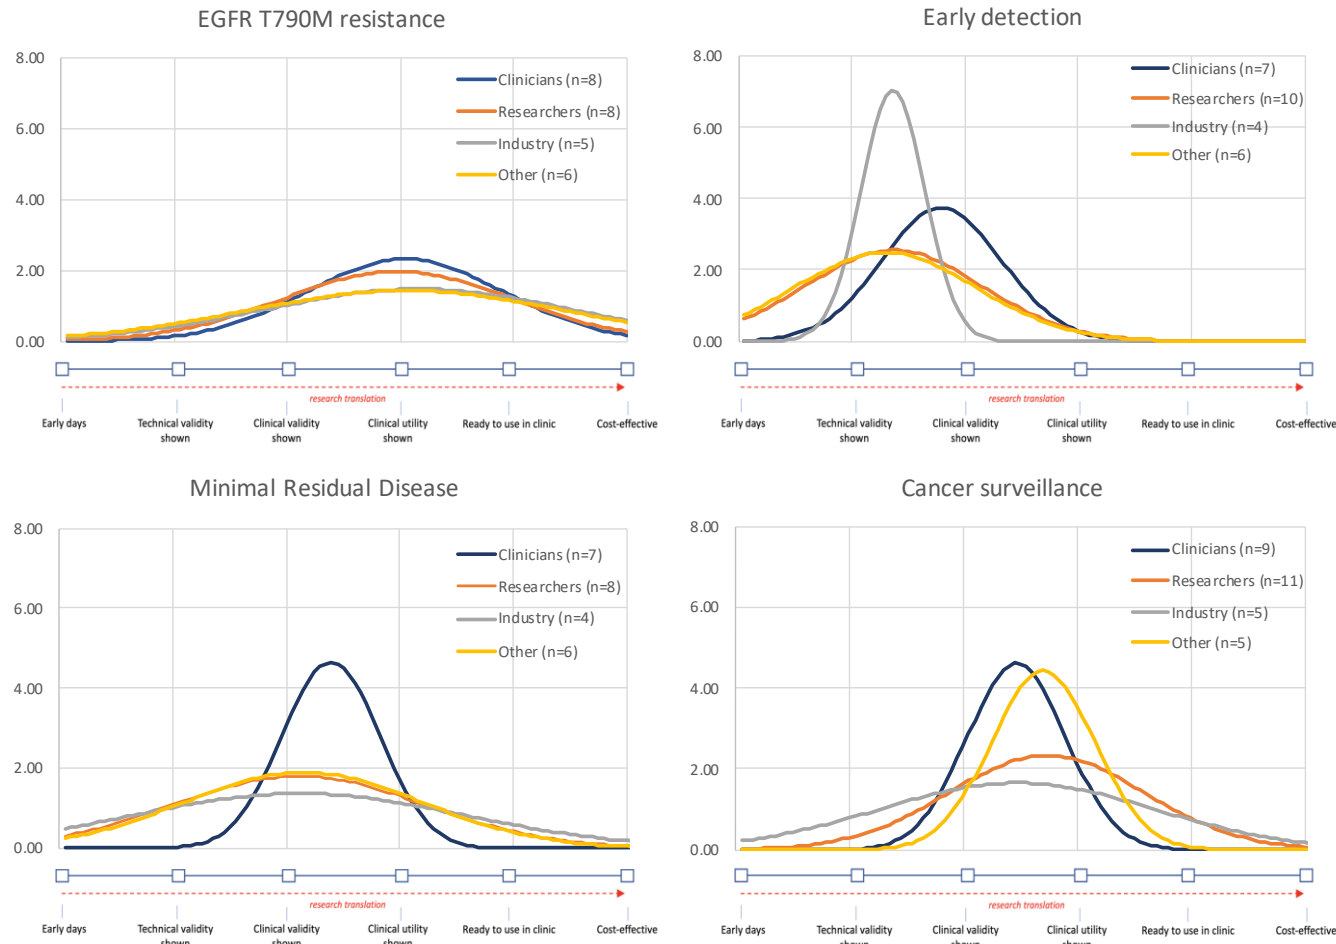

**Figure S4.** Probability of level of evidence available (%) for four different applications and according to four different stakeholder groups. The width of the distribution reflects the uncertainty of the respondents.
